# Supplementary material for: Lincosamide Synthetase—A Unique Condensation System Combining Elements of Nonribosomal Peptide Synthetase and Mycothiol Metabolism
Source: PubMed Central journal article supplement (PMC4351081; doi:10.1371/journal.pone.0118850), 2015-03-05
Supplement: pone.0118850.s003.pdf [file pone.0118850.s003.pdf]

**TABLE S1.** Primers

| Primer                         | Sequence (5' to 3')                                            | Inactivated gene                                                     |
|--------------------------------|----------------------------------------------------------------|----------------------------------------------------------------------|
| <b>A) Inactivation primers</b> |                                                                |                                                                      |
| dCf                            | TCCTTCATGTCGTCCTCCGTTTCGACTCTCCACACTCCTCATTCCGGGGATCCGTCGACC   | lmbC                                                                 |
| dCr                            | TCACTCCCCGCGTGTGACGAGTTCTCCCTGAGCGCGCGTGTAGGCTGGAGCTGCTTC      |                                                                      |
| dDf                            | GACATGAAGGACGTCGAAGAGGTCACAGCGGGACATGATTCCGGGGATCCGTCGACC      | lmbD                                                                 |
| dDr                            | GTTACACCGCTCCCGCGTGAACCGCGCGCCACGGCCCTATGTAGGCTGGAGCTGCTTC     |                                                                      |
| dEf                            | CGAACAAGGGAAAGTAAGGAACGAGACATGACTCAGTGCATTCCGGGGATCCGTCGACC    | lmbE                                                                 |
| dEr                            | TCACGCGGGAGCGGTGAACAGGTCGTGCACCACGGCTTCTGTAGGCTGGAGCTGCTTC     |                                                                      |
| dFf                            | GCTCGGCACGGCGGGGGCGACCCGATGACCGCCACGGCGATTCCGGGGATCCGTCGACC    | lmbF                                                                 |
| dFr                            | TTTCCCTTGTTTCGATTTCGCTGGGTGGGCGGCCGTCACCGTGTAGGCTGGAGCTGCTTC   |                                                                      |
| dIHf                           | GCCGCTACCACGTGTCCGTCTACGCCCCGGGCGCACGGTGATTCCGGGGATCCGTCGACC   | lmbIH                                                                |
| dIHr                           | GTGAAACGTCGTGTGCAACGGGCGGTTGTGGGGTGGTCATGTAGGCTGGAGCTGCTTC     |                                                                      |
| dNf                            | CACCGCCGCCGACACCCTCACCTGGGAGAAACCGTGAGCATTCCGGGGATCCGTCGACC    | lmbN                                                                 |
| dNr                            | TGAACCCGGCTCCGCGGTGACGCAGTACCGCCCGCTCATGTAGGCTGGAGCTGCTTC      |                                                                      |
| N-dIDf                         | CCGGCCGCCATCGCCGCGACGGTGGCCCGTATCACCCATTGAATTCCGGGGATCCGTCGACC | <i>lmbN</i> 3' terminal part coding for ID (in combination with dNr) |
| N-dCPr                         | GGACAGGAGGTTCTCACAACACTCACAGGGGTCTCCTCTGTAGGCTGGAGCTGCTTC      | <i>lmbN</i> 5' terminal part coding for CP (in combination with dNf) |
| dQf                            | GGCCGACGCCGCGGTTCGACAGGCTGGCGGAGGTGTCATGATTCCGGGGATCCGTCGACC   | lmbQ                                                                 |

|                            |                                                             |       |
|----------------------------|-------------------------------------------------------------|-------|
| dQr                        | GAGCGAGGAAGCTCGGAGGTGCTGAGCGGGGGCGGGCTATGTAGGCTGGAGCTGCTTC  |       |
| dTf                        | GGCGCCCAGGTGGCTGCCGGCGGCGTGGCCGGCTATGTGATTCCGGGGATCCGTCGACC | lmbT  |
| dTr                        | GGCGTCGGCCAACTCCCGGACGTTGGCGGCGAAGTCGAATGTAGGCTGGAGCTGCTTC  |       |
| dVf                        | CCCGGAAGCTGGGAGAGAGCCATTTACGCCATCGAGTTGATTCCGGGGATCCGTCGACC | lmbV  |
| dVr                        | CGAAGGCGAGCGCGCGCCCCCGTTCCGTCCGCGCCGTCATGTAGGCTGGAGCTGCTTC  |       |
| <b>B) Checking primers</b> |                                                             |       |
| chCf                       | GGTGATACCGCCATGTC                                           | lmbC  |
| chCr                       | GTCCCGTATCTGCGACT                                           |       |
| chDf                       | AACGGAGGACGACATGA                                           | lmbD  |
| chDr                       | TCACGTGACCCAAGTACC                                          |       |
| chEf                       | CCAGCGAATCGAACAAG                                           | lmbE  |
| chEr                       | GGGCTGGGAGTACCTGT                                           |       |
| chFf                       | GAACGGTACGTGCAACT                                           | lmbF  |
| chFr                       | AGCAGGCACTGAGTCAT                                           |       |
| chIHf                      | GCAACGCCTCCCACACCAACG                                       | lmbIH |
| chIHr                      | ACACGGAGCTGGACCTGATGG                                       |       |
| chNf                       | ACCGTCACCCGCCAGGAGTT                                        | lmbN  |
| chNr                       | AGCCCGTGAGCTCTTCGGTG                                        |       |
| chQf                       | TGCCGGCAGCCACTGTTCCACC                                      | lmbQ  |
| chQr                       | CCGACGAGCGGCGGAGGATGC                                       |       |
| chTf                       | GCCGAACTCGTACTGACC                                          | lmbT  |
| chTr                       | GCGGGCGAACCTCA                                              |       |

|                                                                                |                                                |      |
|--------------------------------------------------------------------------------|------------------------------------------------|------|
| chVf                                                                           | GCCCCGACGGATAGT                                | ImbV |
| chVr                                                                           | AGCAGATTCGACATAG                               |      |
| <b>C) Primers for heterologous expression of <i>S. lincolnensis</i> genes</b>  |                                                |      |
| <b>Primer</b>                                                                  | <b>Sequence (5' to 3')</b>                     |      |
| ExN_NHisF                                                                      | CCGGAATTCGGATCCGGTGAGCACTCTGGACGAGG            |      |
| ExN_NHisR                                                                      | CCGAAGCTTATGCCGGCTCCCCCGC                      |      |
| ExN_CHisF                                                                      | CCGGAATTCATATGAGCACTCTGGACGAGG                 |      |
| ExN_CPR                                                                        | CCGCTCGAGATGGGTGATACGGGCCAC                    |      |
| ExN_IDF                                                                        | CCGCATATGAGTGTTGTGAGGAACCTCC                   |      |
| ExN_CHisR                                                                      | CCGCTCGAGTGCCGGCTCCCCCGC                       |      |
| slpfor                                                                         | CCGCATATGATCGAGGAACTCCTGCC                     |      |
| slp1rev                                                                        | CCGCTCGAGTTAGGGATGCGGCACGGTCACG                |      |
| slp2rev                                                                        | CCGCTCGAGGGGATGCGGCACGGTCACG                   |      |
| <b>D) Primers used in search for <i>slp</i> gene</b>                           |                                                |      |
| P1                                                                             | CGGCATGGTCGGCTCCHTNACNCAYTG                    |      |
| P3-2                                                                           | TGGGTCAGCGGGTACCANRCYTTRWA                     |      |
| slpup                                                                          | CTTCGAGGAGGTGTCGNTNGGNTAYCC                    |      |
| slpdow                                                                         | CGACCGCGAACGCACCGCNGTNCARGC                    |      |
| <b>E) Primers for construction of <i>S. coelicolor</i> M145 mutant strains</b> |                                                |      |
| ExNStopF                                                                       | TTCCATATGTGAACTCTGGACGAGGTCCT                  |      |
| ExN_coelR                                                                      | CCGCTCGAGTCAGTGGTGGTGGTGGTGGTGGTGCCGGCTCCCCCGC |      |
