# Supplementary material for: Lincosamide Synthetase—A Unique Condensation System Combining Elements of Nonribosomal Peptide Synthetase and Mycothiol Metabolism
Source: PubMed Central journal article supplement (PMC4351081; doi:10.1371/journal.pone.0118850), 2015-03-05
Supplement: pone.0118850.s005.pdf [file pone.0118850.s005.pdf]

**Table S3. Details of production of recombinant LmbN, LmbN-CP and LmbN-ID**

| Construct No. | Primer pair <sup>*)</sup> | Vector resistance   | Protein (His-tag) | Usage  | Postinduction T/ time | GroES GroEL |
|---------------|---------------------------|---------------------|-------------------|--------|-----------------------|-------------|
| 1             | ExN_NHisF / ExN_NHisR     | pETDuet-1 ampicilin | LmbN (N His6)     | Ab     | 37°C/2 h              | yes         |
| 2             | ExN_CHisF / ExN_CHisR     | pET42b kanamycin    | LmbN (C His8)     | MW     | 25°C/5 h              | yes         |
| 3             | ExN_CHisF / ExN_CPR       | pET42b kanamycin    | LmbN-CP (C His8)  | MW PPT | 27°C/4 h              | no          |
| 4             | ExN_IDF / ExN_CHisR       | pET42b kanamycin    | LmbN-ID (C His8)  | MW     | 27°C/4 h              | yes         |

<sup>\*)</sup>The primer sequences are summarized in Table S1

chDNA = chromosomal DNA; N His6 = N-terminal 6x His-tag; C His8 = C-terminal 8x His-tag; Ab – template for production of polyclonal antibody; Mw – molecular weight standard for immunodetection; PPT – phosphopantetheinylation assays; LmbN-CP – stand-alone CP domain; LmbN-ID – stand-alone isomerase domain; GroES and GroEL – co-expression with chaperonins GroES and GroEL; All vectors are from Novagen
