# Supplementary material for: Lincosamide Synthetase—A Unique Condensation System Combining Elements of Nonribosomal Peptide Synthetase and Mycothiol Metabolism
Source: PLoS One. 2015 Mar 5;10(3):e0118850. doi: 10.1371/journal.pone.0118850 (PMC4351081; doi:10.1371/journal.pone.0118850)
Supplement: S2 Table — (PDF) [file pone.0118850.s004.pdf]

**Table S2.** Details of protocol for LC-MS analysis of lincomycin, methylthiolincosamide and 4-propyl-L-proline in cultivation broth.

| A. Sample preparation by solid phase extraction |                                                 |                                                |                                               |
|-------------------------------------------------|-------------------------------------------------|------------------------------------------------|-----------------------------------------------|
| Conditions/steps/parameters                     | Lincomycin                                      | Methylthiolincosamide                          | 4-propyl-L-proline                            |
| Sorbent                                         | HLB 3cc (60 mg)                                 | MCX 3cc (60 mg)                                | No extraction                                 |
| Conditioning                                    | 3 mL methanol                                   | 3 mL methanol                                  |                                               |
| Equilibration                                   | 3 mL water                                      | 3 mL 2% formic acid                            |                                               |
| Sample volume and pH                            | 3 mL; pH 9.0                                    | 3 mL; pH 2.5                                   |                                               |
| agent used for pH adjustment                    | ammonium hydroxide                              | formic acid                                    |                                               |
| Washing                                         | 3 mL water                                      | 3 mL 2% formic acid                            |                                               |
| Elution                                         | 1.5 mL methanol                                 | 1.5 mL 50% methanol with 2% ammonium hydroxide |                                               |
| Reconstitution                                  | 600 µL 50% methanol                             | 300 µL; 50% methanol                           | 1 ×                                           |
| Pre-concentration                               | 5 ×                                             | 10 ×                                           |                                               |
| B. UHPLC conditions                             |                                                 |                                                |                                               |
| Mobile phase A (aqueous)                        | 1 mM ammonium formate, pH 9.0                   | 0.1% formic acid                               | 0.1% formic acid                              |
| Mobile phase B (organic)                        | acetonitrile                                    | methanol                                       | methanol                                      |
| Linear gradient (min/%B)                        | 0/5, 1.5/5, 12.5/58, 12.5/100, 14.5/100, 14.5/5 | 0/5, 1.0/5, 2.5/99, 4.5/99, 4.5/5              | 0/5, 5.0/5, 10.0/20, 10.0/99, 11.5/99, 11.5/5 |
| Total analysis time                             | 16 min                                          | 6 min                                          | 13 min                                        |
| C. Internal standard, calibration, LOD and LOQ  |                                                 |                                                |                                               |
| Internal standard                               | N-demethylincomycin, 100 ng mL <sup>-1</sup>    | No quantification                              | 4-butyl-L-proline, 100 ng mL <sup>-1</sup>    |
| Calibration (linear range)                      | 50 - 1000 ng mL <sup>-1</sup> , 5 points        |                                                | 5 - 250 ng mL <sup>-1</sup> , 6 points        |
| Correlation coefficient                         | 0.9979                                          |                                                | 0.9994                                        |
| LOD*                                            | 2 ng mL <sup>-1</sup>                           |                                                | 1 ng mL <sup>-1</sup>                         |
| LOQ*                                            | 10 ng mL <sup>-1</sup>                          |                                                | 5 ng mL <sup>-1</sup>                         |

\*LOD – limit of detection, LOQ – limit of quantification; pre-concentration included (the LOD and LOQ concentrations refer to concentrations in the supernatant of culture broth). LOD determined as a signal three times as high as the noise; LOQ determined as the lowest point of the calibration curve, confirmed by a triplicate of QC samples where the analyte concentration was determined with accuracy and precision in the range 80–120%.
